# Supplementary material for: Risk factors for new chronic opioid use after hip fracture surgery: a Danish nationwide cohort study from 2005 to 2016 using the Danish multidisciplinary hip fracture registry
Source: HighWire-hosted journal article supplement (doi:10.1136/bmjopen-2020-039238), 2021-03-01
Supplement: bmjopen-2020-039238supp002_data_supplement.pdf [file bmjopen-2020-039238supp002_data_supplement.pdf]

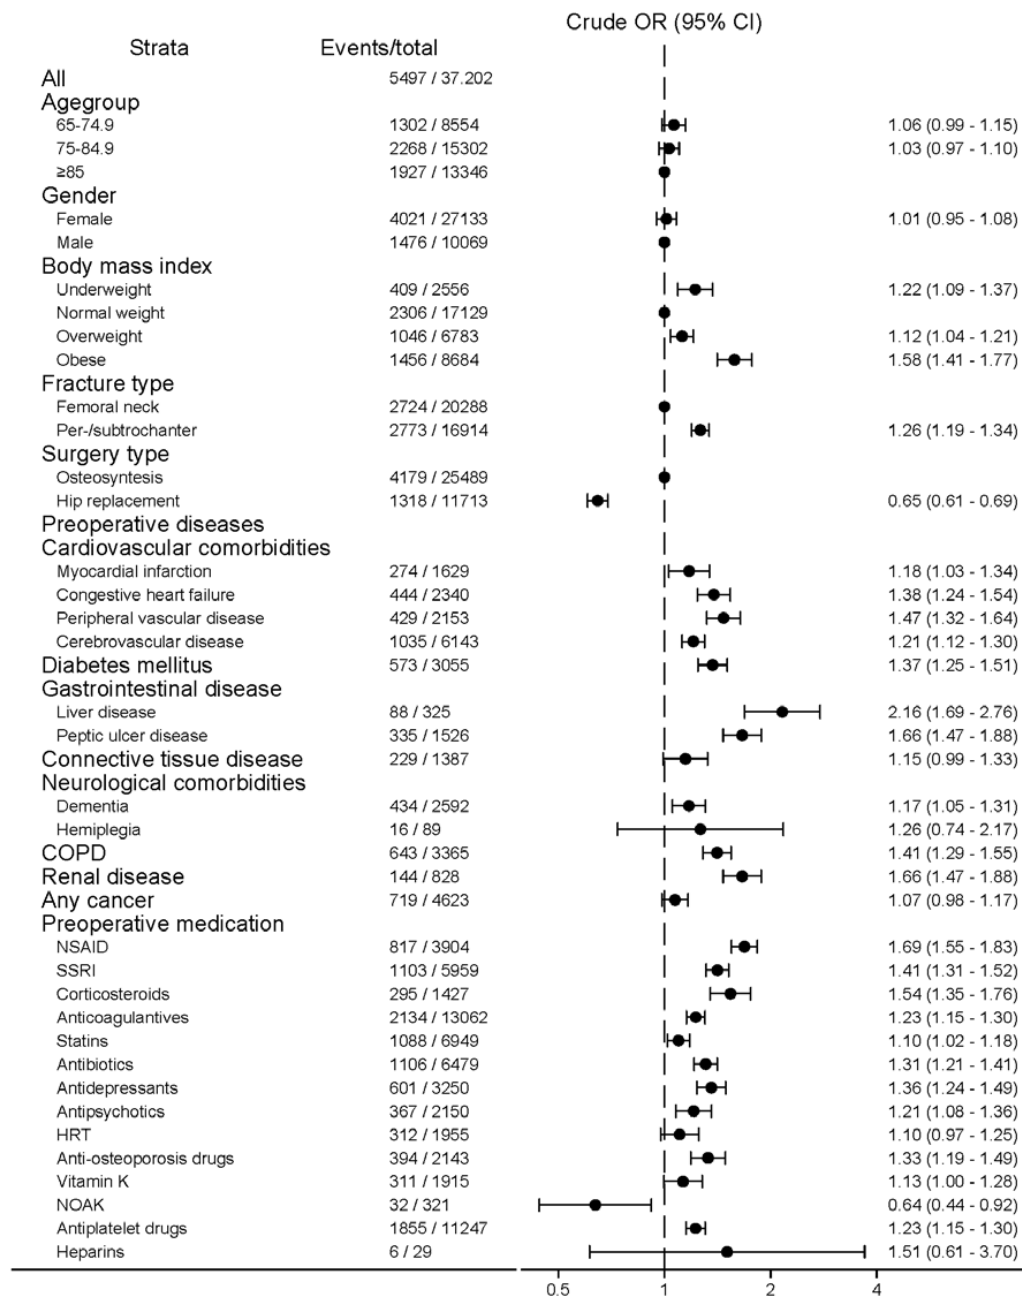

Appendix figure 1: Risk factors for developing new chronic opioid use after hip fracture surgery among patient with no opioid use before surgery and those who were alive 12 months after surgery, crude odds ratios. COPD: Chronic pulmonary disease, NSAID: nonsteroidal anti-inflammatory drug, SSRI: selective serotonin reuptake inhibitors, HRT: Hormone Replacement Therapy, NOAC: novel oral anticoagulant. Odds ratios (ORs) with 95% confidence intervals (CI)
