# Supplementary material for: Risk factors for new chronic opioid use after hip fracture surgery: a Danish nationwide cohort study from 2005 to 2016 using the Danish multidisciplinary hip fracture registry
Source: HighWire-hosted journal article supplement (doi:10.1136/bmjopen-2020-039238), 2021-03-01
Supplement: bmjopen-2020-039238supp005_data_supplement.pdf [file bmjopen-2020-039238supp005_data_supplement.pdf]

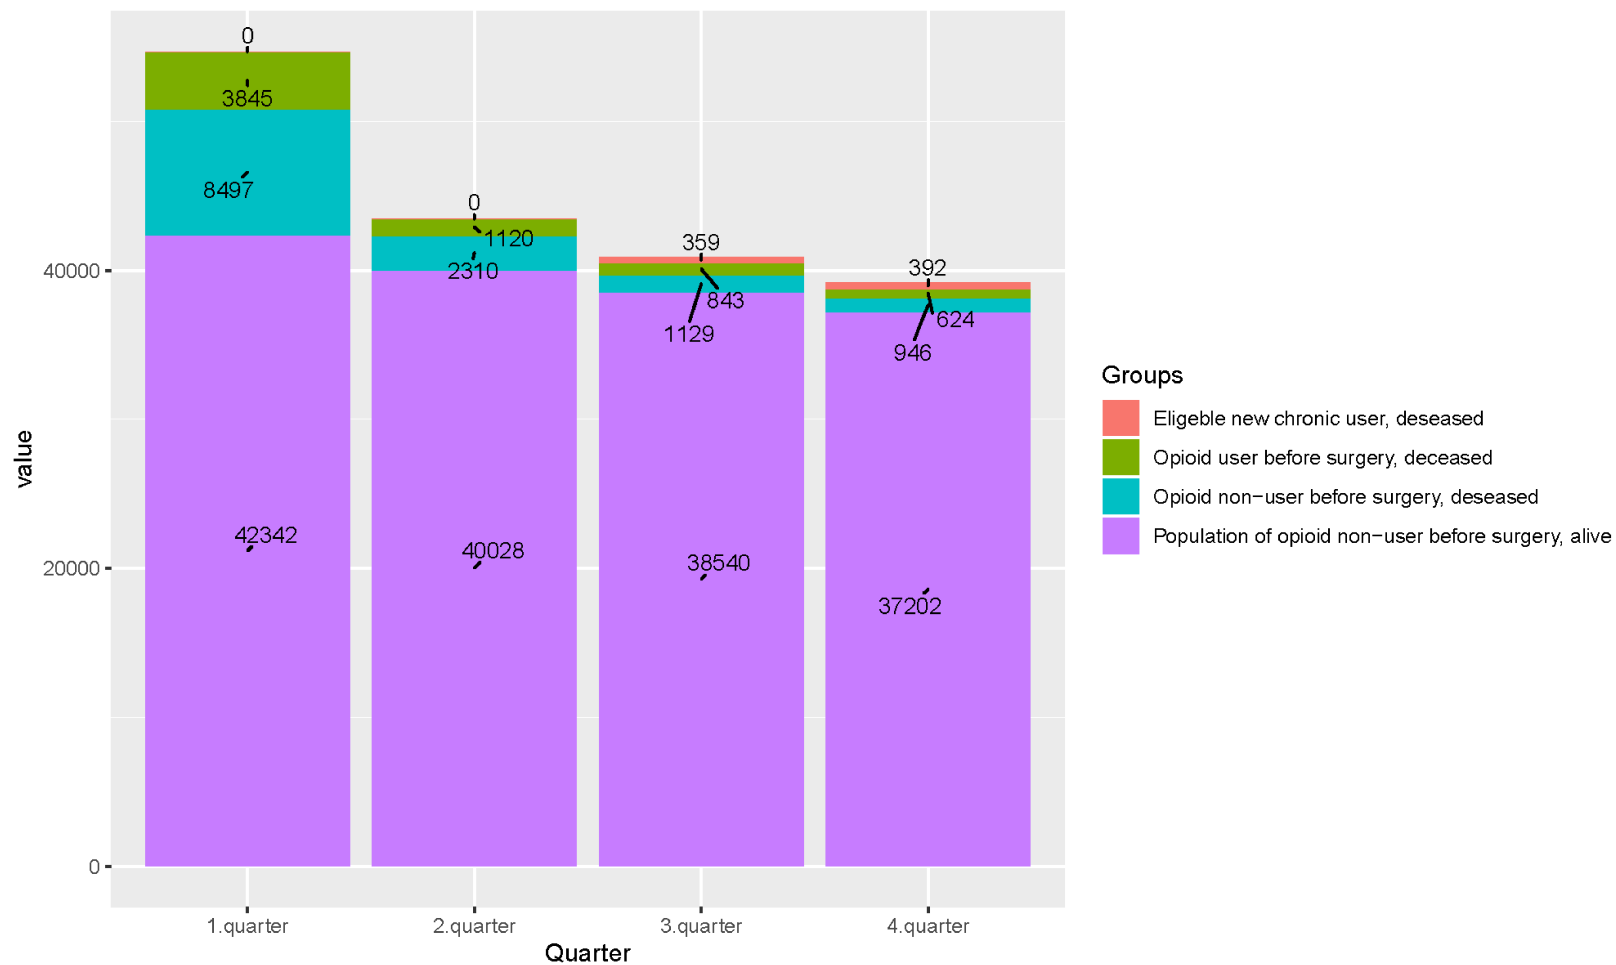

Appendix figure 4: Number of hip fracture patients identified at the time of hip fracture and during the first year following surgery. Patients who were opioid users before surgery were not included in our analyses (number of deceased in this group in each of the 4 quarters of surgery is presented with green color). Our analyses were based on patients with no opioid use before surgery. We presented the number of opioid non-users alive in each of the 4 quarters of surgery with purple color. We presented the number of opioid non-users who dead in each of the 4 quartets of surgery with blue color. Number of eligible new chronic users are patients, who have redeemed two opioid prescriptions, but have died in the first year following surgery, and are therefore not included in our primary analyses (red color).
